# Supplementary material for: Autotrophic biofilms sustained by deeply sourced groundwater host diverse bacteria implicated in sulfur and hydrogen metabolism
Source: PubMed Central journal article supplement (PMC10811913; doi:10.1186/s40168-023-01704-w), 2024-01-26
Supplement: 40168_2023_1704_MOESM8_ESM.pdf [file 40168_2023_1704_MOESM8_ESM.pdf]

|                    |           |       |      | Cations          |                  |                  |                 |                  |                |                  |                  | Anions          |                              |                               |                               |                               |                 |
|--------------------|-----------|-------|------|------------------|------------------|------------------|-----------------|------------------|----------------|------------------|------------------|-----------------|------------------------------|-------------------------------|-------------------------------|-------------------------------|-----------------|
|                    | Flow Rate | Temp. | pH   | Ca <sup>2+</sup> | Mg <sup>2+</sup> | Mn <sup>4+</sup> | Na <sup>+</sup> | Fe <sup>3+</sup> | K <sup>+</sup> | Si <sup>4+</sup> | Sr <sup>2+</sup> | Cl <sup>-</sup> | NO <sub>2</sub> <sup>-</sup> | NO <sub>3</sub> <sup>2-</sup> | PO <sub>4</sub> <sup>2-</sup> | SO <sub>4</sub> <sup>2-</sup> | HS <sup>-</sup> |
| <b><u>MS4</u></b>  | 169.83    | 28.80 | 6.99 | 83.88            | 32.21            | 0.32             | 643.44          | 0.06             | 21.62          | 10.67            | 15.6             | 16.27           | 2.33                         | 1.93                          | 0.61                          | 106.60                        | 0.29            |
|                    | [1.76]    |       |      | [2.37]           | [0.93]           | [0.016]          | [21.28]         | -                | [0.86]         | [0.19]           | [.648]           | [0.90]          | [1.25]                       | [0.09]                        | [0.044]                       | [6.24]                        | [0.034]         |
| <b><u>MS11</u></b> | 261.75    | 27.40 | 7.40 | 163.20           | 67.16            | 0.49             | 791.89          | 0.09             | 24.24          | 11.95            | 24.09            | 29.33           | 4.33                         | 2.81                          | 0.16                          | 213.30                        | 1.66            |
|                    | [9.05]    |       |      | [2.24]           | [1.27]           | [0.012]          | [14.38]         | -                | [1.34]         | [0.17]           | [1.26]           | [2.62]          | [0.47]                       | [0.50]                        | [0.06]                        | [6.24]                        | [0.29]          |
