# Supplementary material for: Autotrophic biofilms sustained by deeply sourced groundwater host diverse bacteria implicated in sulfur and hydrogen metabolism
Source: PubMed Central journal article supplement (PMC10811913; doi:10.1186/s40168-023-01704-w), 2024-01-26
Supplement: 40168_2023_1704_MOESM9_ESM.pdf [file 40168_2023_1704_MOESM9_ESM.pdf]

|   | Energy (eV) | Transition                                          | Functional group                                                                  | Cell | EPS | Filament |
|---|-------------|-----------------------------------------------------|-----------------------------------------------------------------------------------|------|-----|----------|
| a | 285.1-285.2 | $1s \rightarrow \pi^*_{C=C}$                        | unsaturated or aromatic C                                                         | y    | y   | y        |
| b | 286         | $1s \rightarrow \pi^*$                              | DNA                                                                               | y    |     | y        |
| c | 286.6-286.7 | $1s \rightarrow \pi^*$                              | ketones, phenols, carbonyl (DNA)                                                  | y    |     | y        |
| d | 287.4-287.6 | $1s \rightarrow \pi^*$<br>$1s \rightarrow \sigma^*$ | (DNA), aliphatic C, aromatic carbonyl, aromatic hydroxyl, other oxygenated groups | y    | y   | y        |
| e | 288.2       | $1s \rightarrow \pi^*_{C=O}$                        | amide carbonyl (peptide bond)                                                     | y    |     | y        |
| f | 288.7       | $1s \rightarrow \pi^*_{C=O}$                        | carboxyl (polysaccharide)                                                         |      | y   |          |
| g | 289.4-289.5 | $1s \rightarrow \sigma^*$<br>$1s \rightarrow \pi^*$ | alcohol, aliphatic ether, carbonyl (DNA)                                          | y    | y   | y        |
|   | 290.7       | $1s \rightarrow \pi^*_{C=O}$                        | Carbonates                                                                        |      |     |          |
|   | 297.4       | $2p_{3/2} \rightarrow 3d/\sigma^*$                  | Potassium L <sub>3</sub>                                                          |      |     |          |
|   | 299.9       | $2p_{1/2} \rightarrow 3d/\sigma^*$                  | Potassium L <sub>2</sub>                                                          |      |     |          |
